# Supplementary material for: Anti-inflammatory and intestinal microbiota modulation properties of high hydrostatic pressure treated cyanidin-3-glucoside and blueberry pectin complexes on dextran sodium sulfate-induced ulcerative colitis mice
Source: Royal Society of Chemistry journal article supplement (doi:10.1039/d1fo03376j), 2022-01-01
Supplement: d1fo03376j2.pdf [file d1fo03376j2.pdf]

Supplemental materials

**Table S1**

DAI scoring standard

| Score | Weight loss (%) | Diarrhea degree | Bloody stools       |
|-------|-----------------|-----------------|---------------------|
| 0     | None            | Normal          | None                |
| 1     | 1-5             | Soft and shaped | Between             |
| 2     | 6-10            | Loose           | Stool occult blood  |
| 3     | 11-20           | Between         | Between             |
| 4     | >20             | Diarrhea        | Defecate hemorrhage |

**Table S2**

Colon mucosal damage index scores

| <b>Score</b> | <b>Inflammation</b>                                                                                                   | <b>Crypt Damage</b>                                                           | <b>Ulceration</b>                      | <b>Edema</b> |
|--------------|-----------------------------------------------------------------------------------------------------------------------|-------------------------------------------------------------------------------|----------------------------------------|--------------|
| <b>0</b>     | No infiltrate                                                                                                         | None                                                                          | None                                   | None         |
| <b>1</b>     | Occasional cell limited to submucosa                                                                                  | Some crypt damage, spaces between crypts                                      | Small, focal ulcers                    | Present      |
| <b>2</b>     | Significant presence of inflammatory cells in submucosa, limited to focal areas                                       | Larger spaces between crypts, loss of goblet cells, some shortening of crypts | Frequent small ulcers                  |              |
| <b>3</b>     | Infiltrate present in both submucosa and lamina propria, limited to focal areas                                       | Large areas without crypts, surrounded by normal crypts                       | Large areas lacking surface epithelium |              |
| <b>4</b>     | Large amount of infiltrate in submucosa, lamina propria and surrounding blood vessels, covering large areas of mucosa | No crypts                                                                     |                                        |              |
| <b>5</b>     | Transmural inflammation (mucosa to muscularis)                                                                        |                                                                               |                                        |              |

**Table S3**

The oligonucleotide primer sets for the real-time PCR analysis of IL-6, IL-8, IL-1 $\beta$ , TNF- $\alpha$ , iNOS, COX-2 and GAS5.

| Name             | Sequence (5'-3')       | Length | Tm   | size |
|------------------|------------------------|--------|------|------|
| IL-6 F           | ATGGCAATTCTGATTGTATG   | 20     | 50.7 | 212  |
| IL-6 R           | GACTCTGGCTTTGTCTTTCT   | 20     | 50.9 |      |
| IL-8 F           | CACAAACTTTCAGAGACAGCAG | 22     | 55.3 | 226  |
| IL-8 R           | GTGGAAAGGTTTGGAGTATGTC | 22     | 55.6 |      |
| IL-1 $\beta$ F   | GAATCTCCGACCACCACTAC   | 20     | 53.9 | 191  |
| IL-1 $\beta$ R   | CACATAAGCCTCGTTATCCC   | 20     | 54.9 |      |
| TNF- $\alpha$ F  | GAGTGACAAGCCTGTAGCC    | 19     | 52.4 | 168  |
| TNF- $\alpha$ R  | AAGAGGACCTGGGAGTAGAT   | 20     | 51.8 |      |
| iNOS F           | CACCACCCTCCTCGTTC      | 17     | 52.8 | 132  |
| iNOS R           | CAATCCACAACCTCGCTCC    | 18     | 53.7 |      |
| COX-2 F          | AAAACCTCGTCCAGATGCTA   | 20     | 54.9 | 100  |
| COX-2 R          | TTGAGGAGAACAGATGGGAT   | 20     | 53.9 |      |
| GAS5 F           | TGAAGGCACTGCAAACAC     | 18     | 52.4 | 121  |
| GAS5 R           | CCAGGCACCTCAGAAACA     | 18     | 54.1 |      |
| $\beta$ -actin F | GGCACCCAGCACAATGAA     | 18     | 57.7 | 168  |
| $\beta$ -actin R | TAGAAGCATTTGCGGTGG     | 18     | 55.1 |      |
