# Supplementary figures and images for: Anti-inflammatory and intestinal microbiota modulation properties of high hydrostatic pressure treated cyanidin-3-glucoside and blueberry pectin complexes on dextran sodium sulfate-induced ulcerative colitis mice
Source: Royal Society of Chemistry journal article supplement (doi:10.1039/d1fo03376j), 2022-01-01

Raw images of Western blot

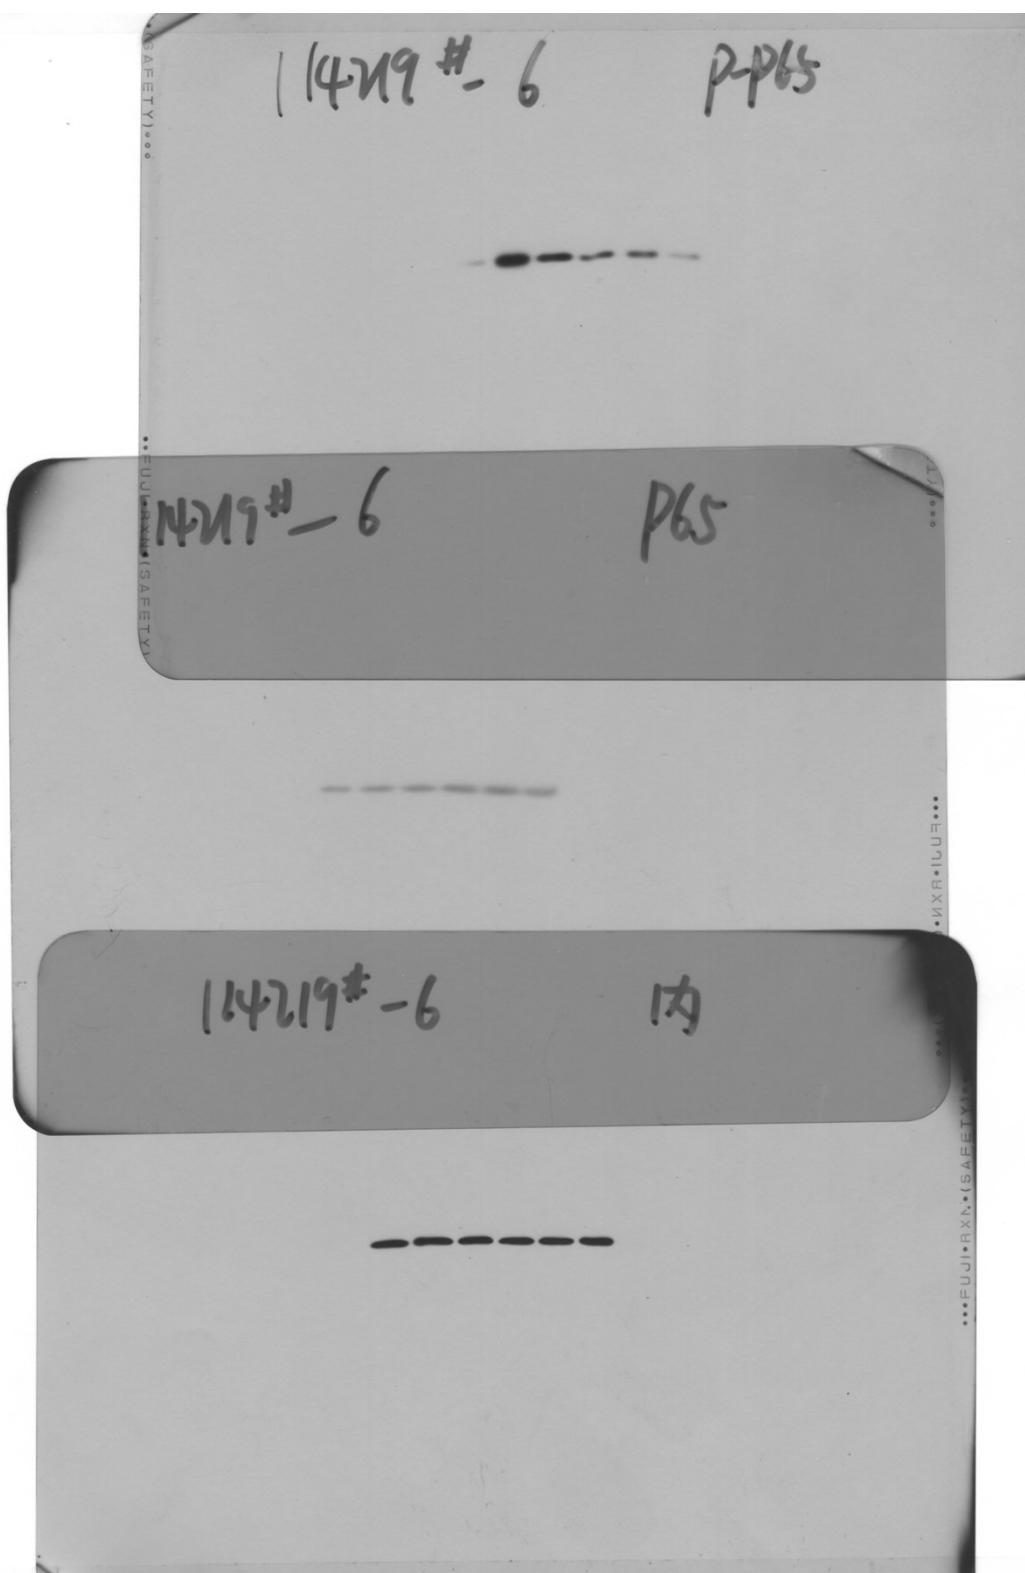

114M9#-7

Bd-2

-----

114M9#-7

内

-----

114219# - 8      Caspar.63

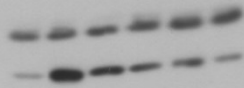

...FUJI•RXN•(SAFETY)...

114219# - 8

(A)

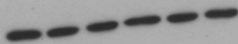

...FUJI•RXN•(SAFETY)...

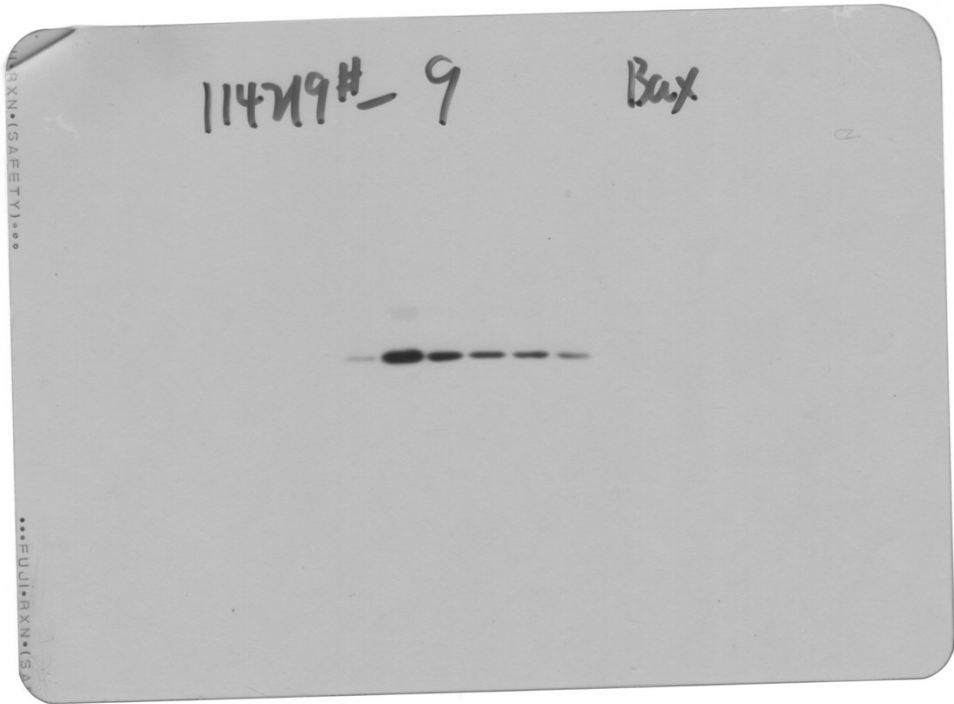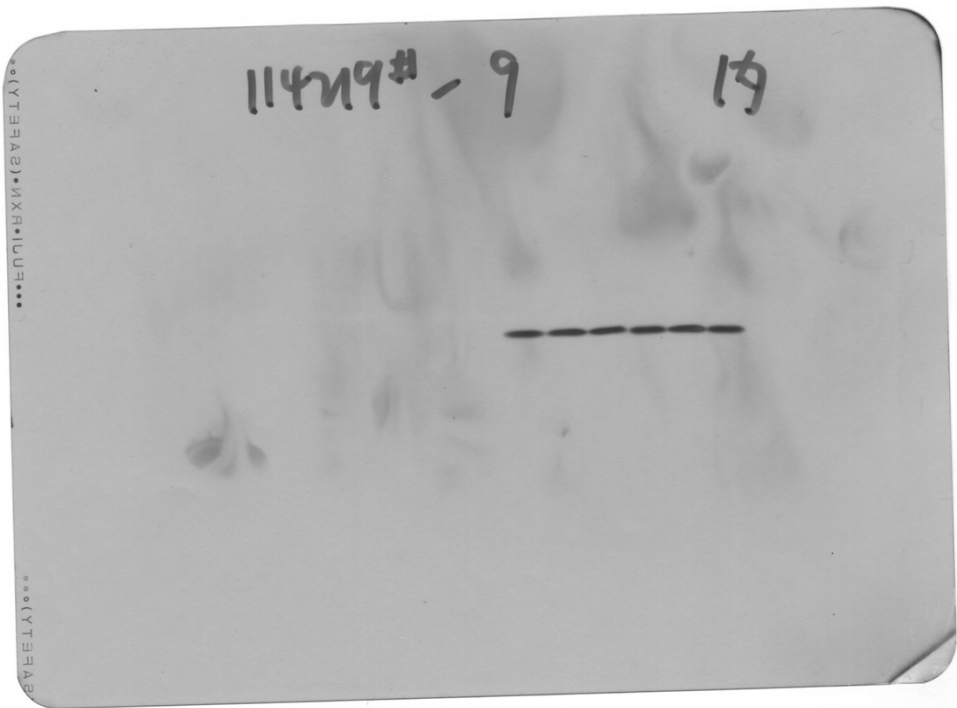

Supplement: d1fo03376j1.pdf [file d1fo03376j1.pdf]
